# Supplementary material
Source: publisher figshare collection journal article supplement (https://gsajournals.figshare.com/ndownloader/files/15368759)
Supplement: Supplementary file 1 [file 15368759]

## Sheet: Sheet1
Table S5: List of differentially upregulated genes with Stat92E binding sites
Flybase ID	Gene	Predicted Binding Sites	Fold Change	Adjusted p-value
FBgn0041184	Socs36E	8	1.87807	4.58777e-06
FBgn0086758	chinmo	6	4.73673	5.43873e-23
FBgn0001138	grn	6	2.31331	1.10667e-10
FBgn0058006	CG40006	5	1.78464	0.00673365
FBgn0265416	Neto	4	2.41088	0.00508012
FBgn0052085	CG32085	4	1.83674	0.0235069
FBgn0259242	CG42340	4	1.7769	0.0431084
FBgn0031645	CG3036	3	3.70112	1e-14
FBgn0033679	CG8888	3	2.15184	0.00676829
FBgn0035023	ITP	3	1.90067	0.00201502
FBgn0003716	tkv	3	1.78976	3.98721e-05
FBgn0085408	Shroom	3	1.51143	0.0194582
FBgn0039647	sda	2	2.81735	2.33361e-23
FBgn0014859	Hr38	2	2.41605	2.88804e-09
FBgn0267033	mamo	2	2.34224	6.24555e-08
FBgn0038946	rdhB	2	2.30076	0.00944491
FBgn0038840	CG5621	2	2.29137	0.00527131
FBgn0028888	CG4168	2	2.253	0.0100207
FBgn0259821	CG42402	2	2.1622	0.00138447
FBgn0085427	CG34398	2	1.94204	0.0010096
FBgn0004652	fru	2	1.92311	0.00117654
FBgn0085386	CG34357	2	1.85065	0.00503096
FBgn0030065	CG12075	2	1.78993	0.00345279
FBgn0284084	wg	2	1.77146	3.68908e-06
FBgn0016076	vri	2	1.68452	0.0101868
FBgn0265042	Irk1	2	1.68451	0.00147955
FBgn0261588	pdm3	2	1.6586	0.000605327
FBgn0000719	fog	2	1.64804	0.0101925
FBgn0023407	B4	2	1.63772	0.00552989
FBgn0000008	a	2	1.6289	0.0315446
FBgn0264078	Flo2	2	1.61504	0.00231926
FBgn0261545	CG42663	2	1.58156	0.00344465
FBgn0285926	Imp	2	1.51979	0.00663513
FBgn0031738	CG9171	2	1.51812	0.00597131
FBgn0086687	Desat1	2	1.51625	0.0201275
FBgn0267582	CR45922	1	5.29922	1.144e-11
FBgn0052192	CG32192	1	4.30424	6.24555e-08
FBgn0034286	dpr13	1	3.6671	2.64802e-06
FBgn0029881	pigs	1	3.27152	3.4e-13
FBgn0008646	E5	1	2.87653	0.000224957
FBgn0039972	CG17018	1	2.84747	1.27396e-05
FBgn0266984	CR45435	1	2.66922	0.00155271
FBgn0029663	CG10804	1	2.60537	0.000494354
FBgn0026415	Idgf4	1	2.32893	0.000954549
FBgn0267086	CR45530	1	2.29716	0.000188324
FBgn0052625	CG32625	1	2.20149	0.013648
FBgn0051076	CG31076	1	2.19644	0.00766448
FBgn0037992	CG4702	1	2.1676	0.000782359
FBgn0028699	Rh50	1	2.14462	0.0196943
FBgn0030258	CG1552	1	2.12127	0.0151318
FBgn0037475	Fer1	1	2.11207	0.0244077
FBgn0030356	CR32661	1	2.09073	0.0245569
FBgn0011244	Hsp60B	1	2.06442	0.0179861
FBgn0011706	rpr	1	2.05197	0.00656601
FBgn0266003	CR44777	1	2.04572	0.0192754
FBgn0030041	CG12116	1	2.03949	0.0290546
FBgn0000535	eag	1	2.00682	0.0130435
FBgn0035539	slow	1	2.00502	7.06671e-06
FBgn0050046	CG30046	1	1.98883	0.0416932
FBgn0036809	CG12477	1	1.97523	0.0429331
FBgn0039471	CG6295	1	1.96137	0.0475272
FBgn0035708	CG8398	1	1.96019	0.0230511
FBgn0041182	Tep2	1	1.9569	0.000210525
FBgn0036043	CG8177	1	1.93922	0.0315387
FBgn0052091	CG32091	1	1.93854	0.000392168
FBgn0085243	CG34214	1	1.93016	0.0482984
FBgn0039937	fd102C	1	1.92214	0.000971688
FBgn0036381	CG8745	1	1.91664	0.0227324
FBgn0250910	Octbeta3R	1	1.91547	0.0086965
FBgn0014466	Cp7Fc	1	1.90037	0.0473066
FBgn0026077	Gasp	1	1.89164	0.000807259
FBgn0264442	ab	1	1.86955	0.00101166
FBgn0032414	CG17211	1	1.86653	0.000250397
FBgn0051665	wry	1	1.85777	0.0464798
FBgn0085425	CG34396	1	1.8527	0.00310314
FBgn0041711	yellow-e	1	1.83748	0.0167122
FBgn0001078	ftz-f1	1	1.82542	0.00345344
FBgn0086558	Ubi-p5E	1	1.81244	0.000255113
FBgn0264324	spg	1	1.80998	0.00441865
FBgn0261611	CG42700	1	1.79853	0.0205642
FBgn0036985	zye	1	1.78599	0.0208746
FBgn0053196	dp	1	1.77053	0.000293345
FBgn0016694	Pdp1	1	1.76763	0.00327974
FBgn0261258	rgn	1	1.75919	0.00317438
FBgn0260657	CG42540	1	1.7511	0.015446
FBgn0030396	CG2556	1	1.74992	0.0379175
FBgn0051145	CG31145	1	1.74859	0.032384
FBgn0052537	CG32537	1	1.74421	0.0195947
FBgn0043903	dome	1	1.74076	1.76923e-06
FBgn0011589	Elk	1	1.7257	0.0477409
FBgn0010223	Galphaf	1	1.72346	0.0114505
FBgn0003068	per	1	1.7152	0.0326414
FBgn0003867	tsl	1	1.70689	0.00161963
FBgn0042206	GstD10	1	1.70313	0.0138276
FBgn0039346	CG5079	1	1.70312	0.0218598
FBgn0053181	CG33181	1	1.69839	0.00511175
FBgn0038803	CG5191	1	1.6962	0.0100207
FBgn0038720	CG6231	1	1.69152	0.00808257
FBgn0285944	para	1	1.67873	0.000414183
FBgn0015371	chn	1	1.67541	0.000169522
FBgn0001311	kkv	1	1.6723	2.79039e-06
FBgn0002932	neur	1	1.67008	0.000653504
FBgn0034985	CG3328	1	1.66331	3.92649e-05
FBgn0001253	ImpE1	1	1.65557	0.0246018
FBgn0022382	Pka-R2	1	1.6462	0.0387156
FBgn0030520	Pdcd4	1	1.63335	0.0017104
FBgn0038020	GstD9	1	1.62931	0.0330383
FBgn0017448	CG2187	1	1.62175	0.0483868
FBgn0025525	bab2	1	1.60345	0.00258081
FBgn0034725	CG6044	1	1.60265	0.034383
FBgn0267977	mh	1	1.60263	0.0408756
FBgn0020257	Ppa	1	1.59546	0.01039
FBgn0002306	sas	1	1.5921	0.00345344
FBgn0034408	sano	1	1.5884	0.00201579
FBgn0001981	esg	1	1.57863	0.00946981
FBgn0034897	Sesn	1	1.5743	0.0186944
FBgn0260795	NaPi-III	1	1.57398	0.00441865
FBgn0016797	fz2	1	1.56932	4.10932e-06
FBgn0085376	CG34347	1	1.56927	0.0214488
FBgn0030791	CG9132	1	1.5688	0.0193026
FBgn0013718	nuf	1	1.56847	0.000719909
FBgn0001149	GstD1	1	1.56582	0.000657503
FBgn0086251	del	1	1.56022	0.0385176
FBgn0003016	osp	1	1.54447	0.00178391
FBgn0034540	Lrt	1	1.53549	0.0412866
FBgn0259938	cwo	1	1.52824	0.0279043
FBgn0003463	sog	1	1.52786	0.0458092
FBgn0265512	mlt	1	1.52132	0.0343876
FBgn0003028	ovo	1	1.5201	0.0157927
FBgn0010222	Nmdmc	1	1.51943	0.0197872
FBgn0000492	Dr	1	1.51813	0.00406972
FBgn0003390	shf	1	1.51659	0.0431301
FBgn0034724	babos	1	1.51642	0.0472637
